# Supplementary material for: Transcriptomic Analysis of Colorectal Cancer Cells Treated with Oil Production Waste Products (OPWPs) Reveals Enrichment of Pathways of Mitochondrial Functionality
Source: MDPI journal article supplement (doi:10.3390/cells11243992), 2022-12-10

**Transcriptomic analysis of colorectal cancer cells treated with  
Oil Production Waste Products (OPWPs) reveals enrichment of  
pathways of mitochondrial functionality**

**Manuela Leo<sup>§</sup>, Livio Muccillo<sup>§</sup>, Erica Pranzini, Giovannina Barisciano, Matteo Parri,  
Giulia Lopatriello, Marco Carlomagno, Alice Santi, Maria Letizia Taddei\*, Lina Sabatino\***

## **Content of Supplementary Information**

Supplementary Figure S1

Supplementary Figure S2

Supplementary Table S1 (.xls)

Upregulated Pathways

Downregulated Pathways

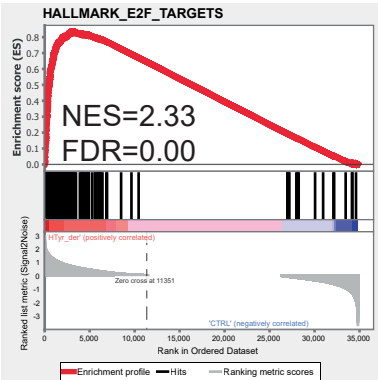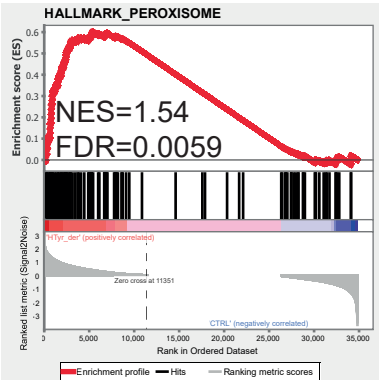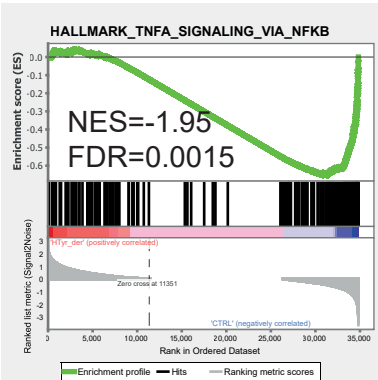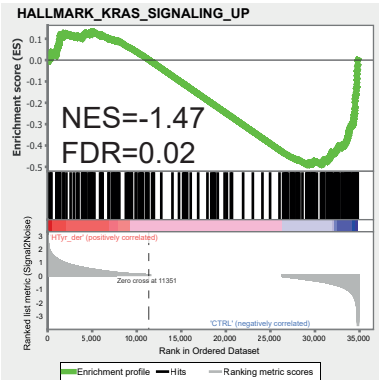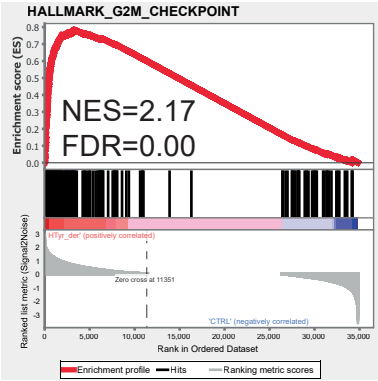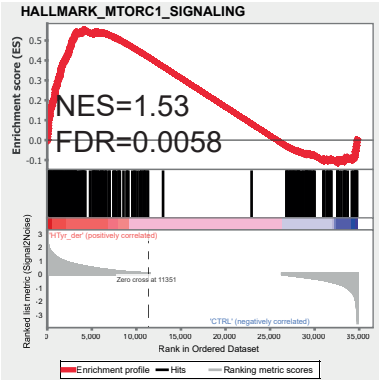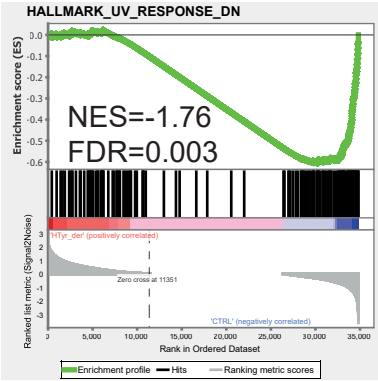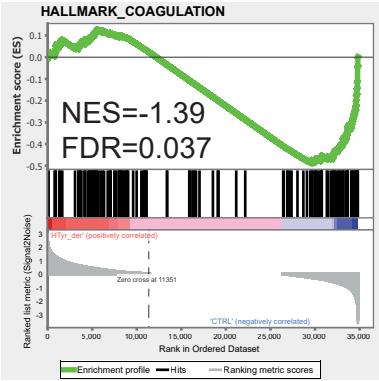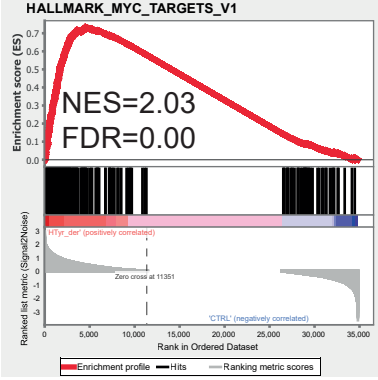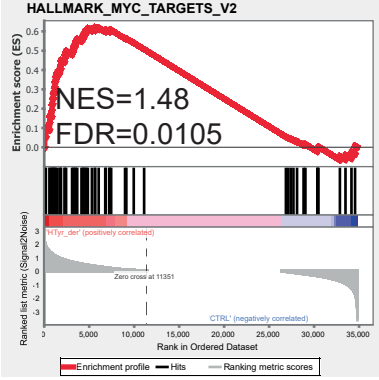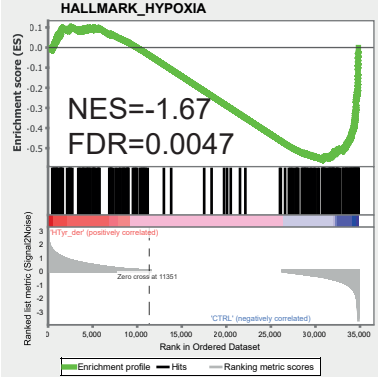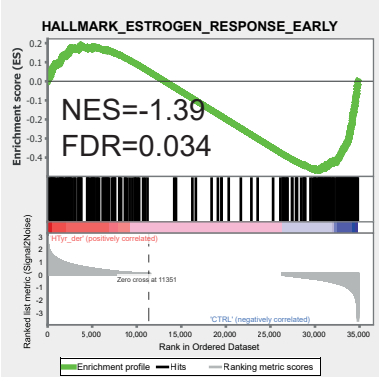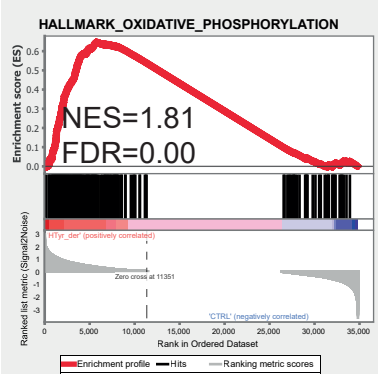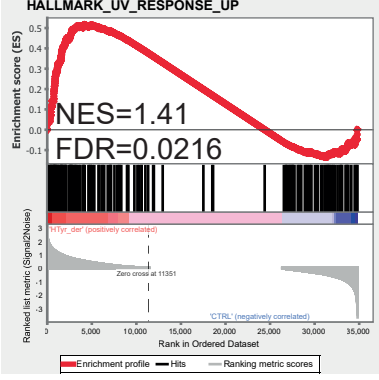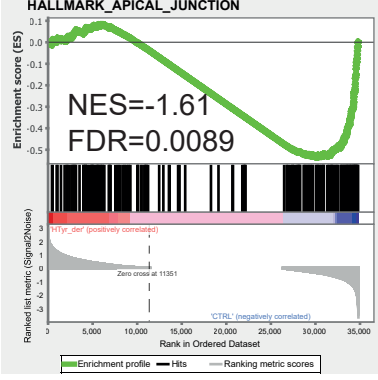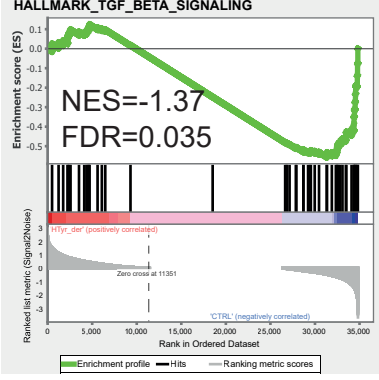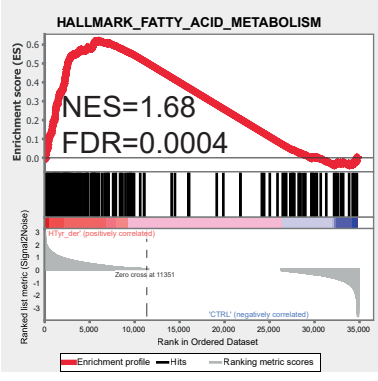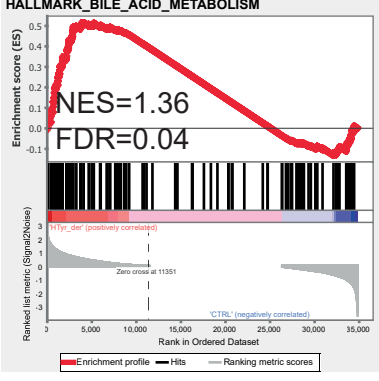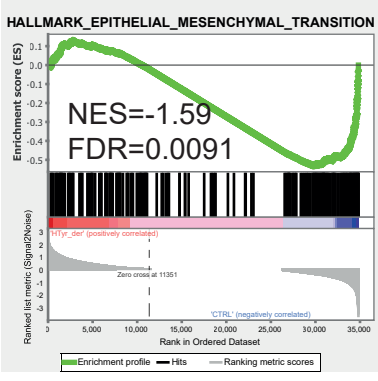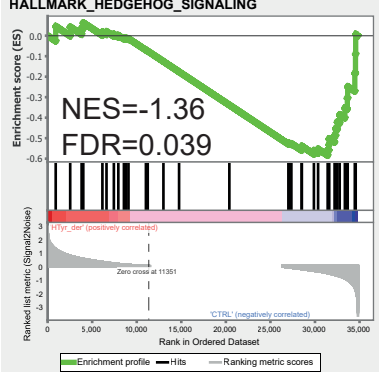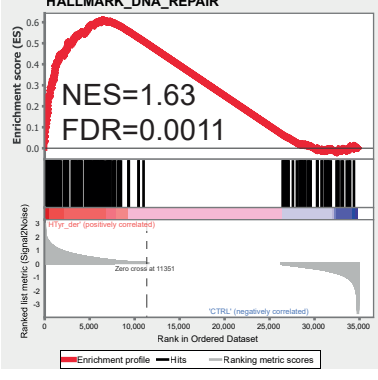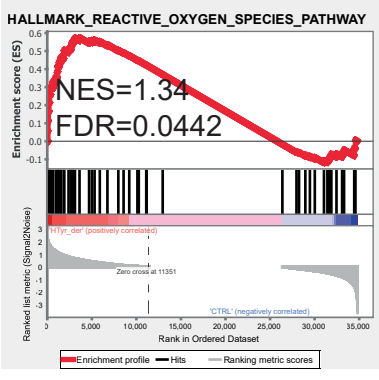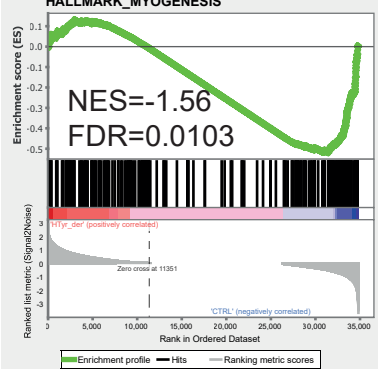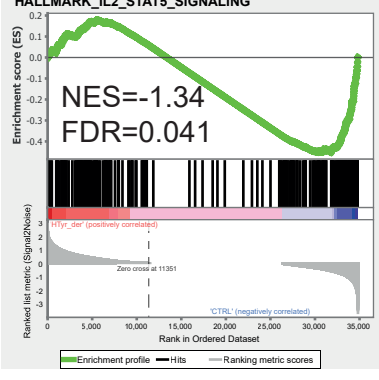

Supplementary Figure S2

PPARG ChIP-seq on HepG2

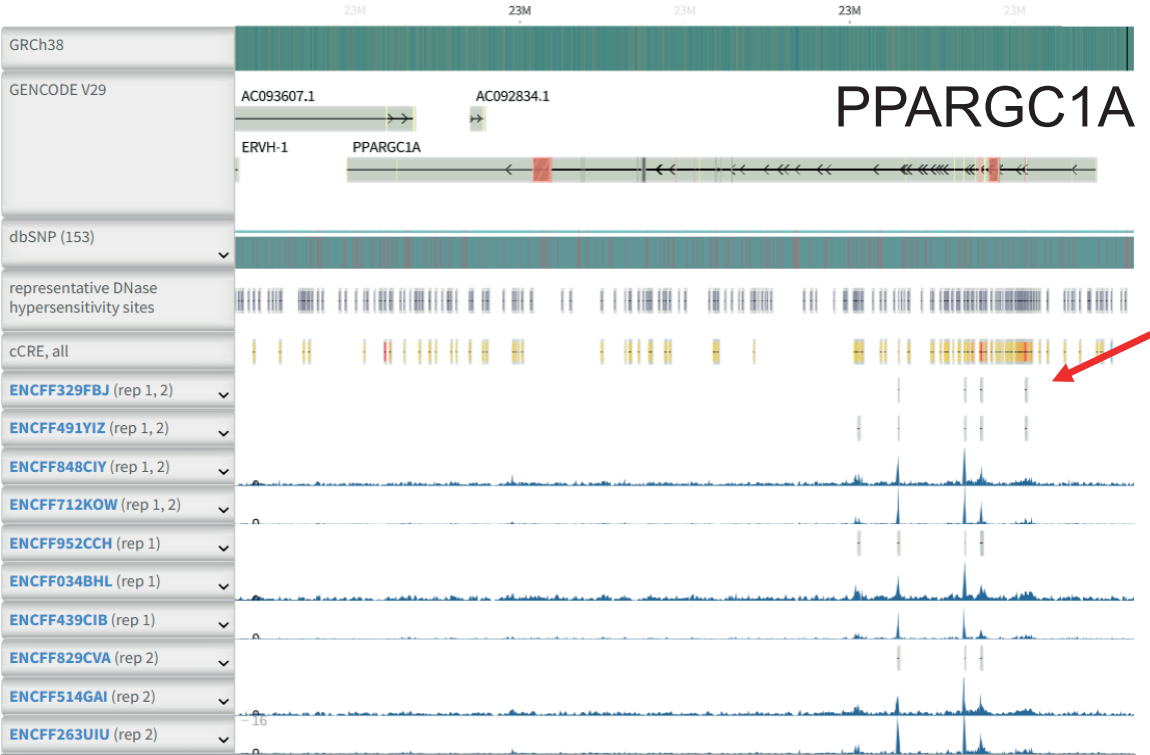

FOXJ3 ChIP-seq on HepG2

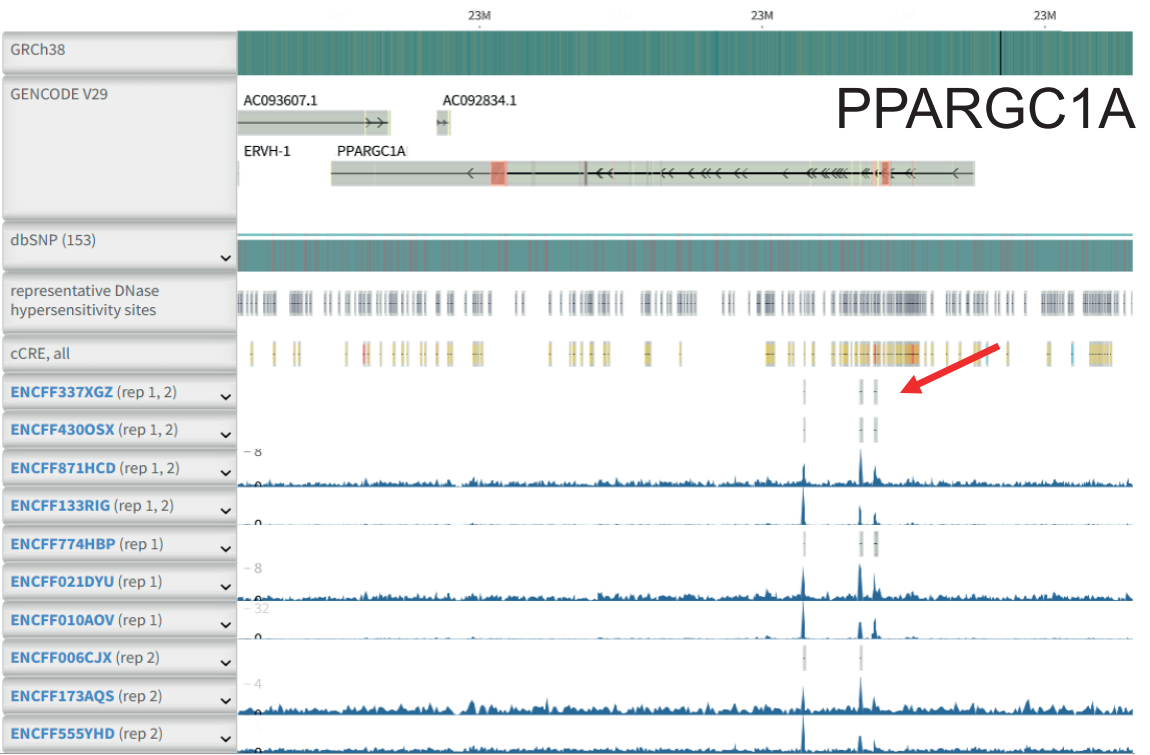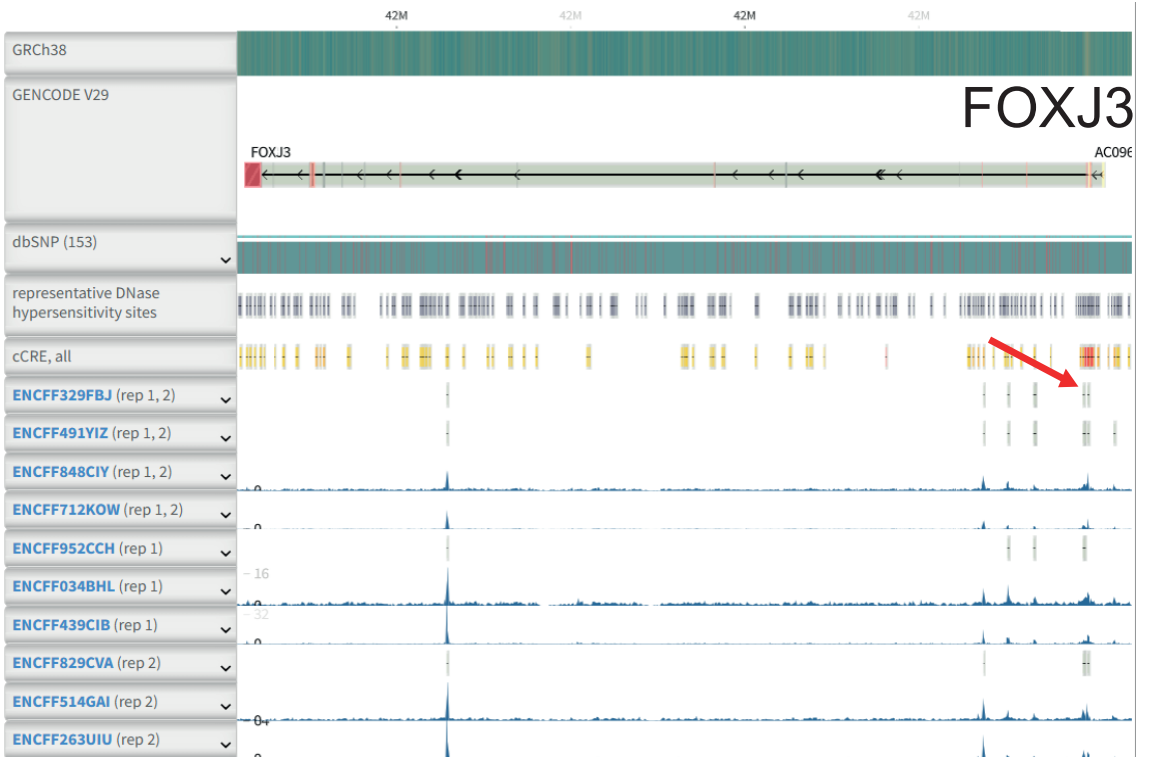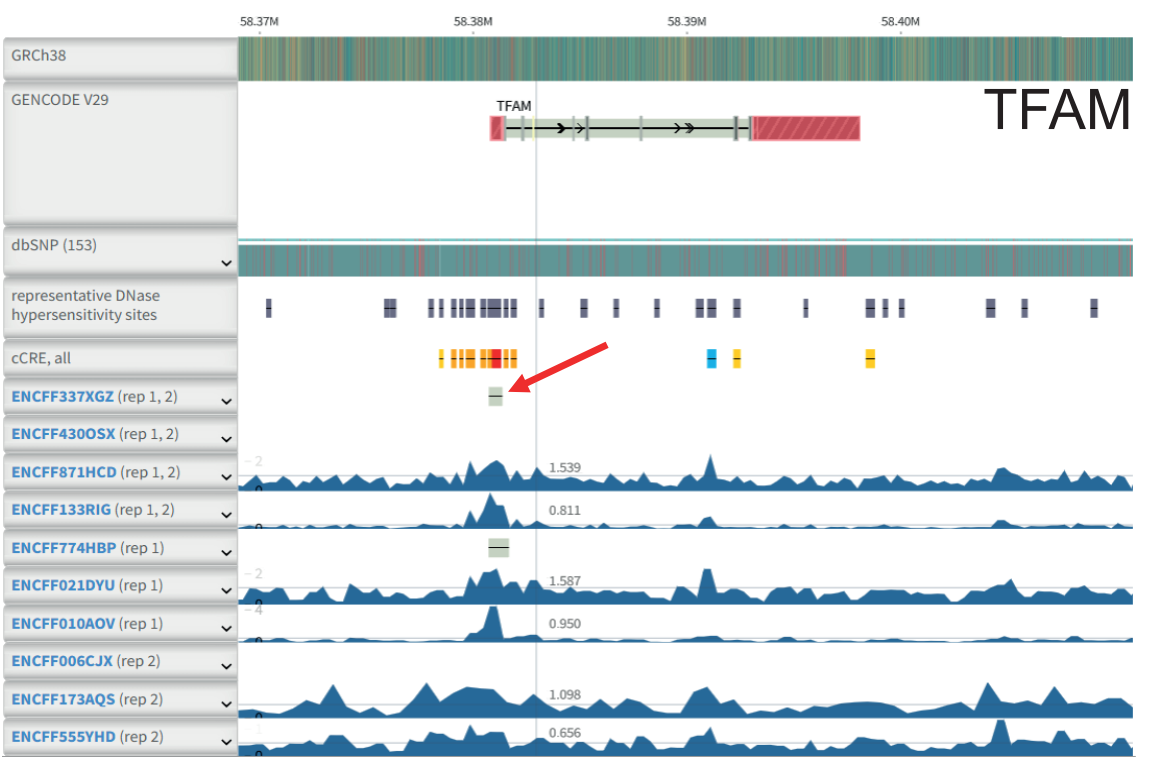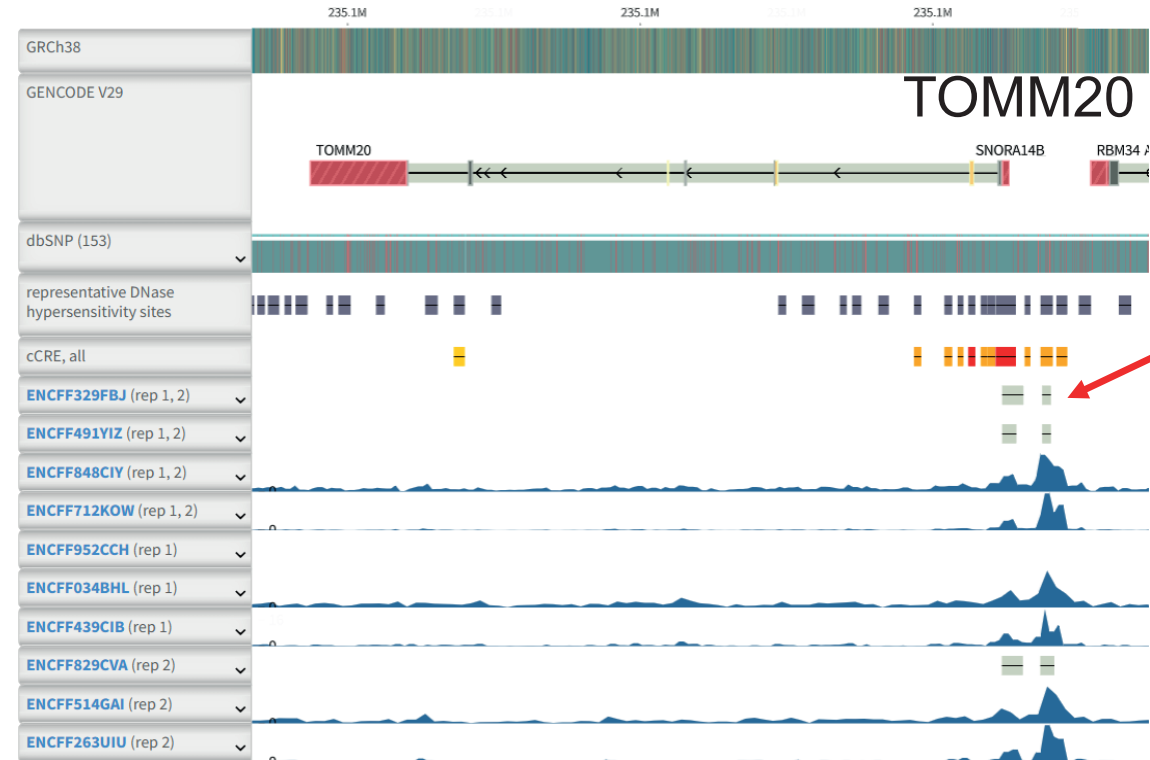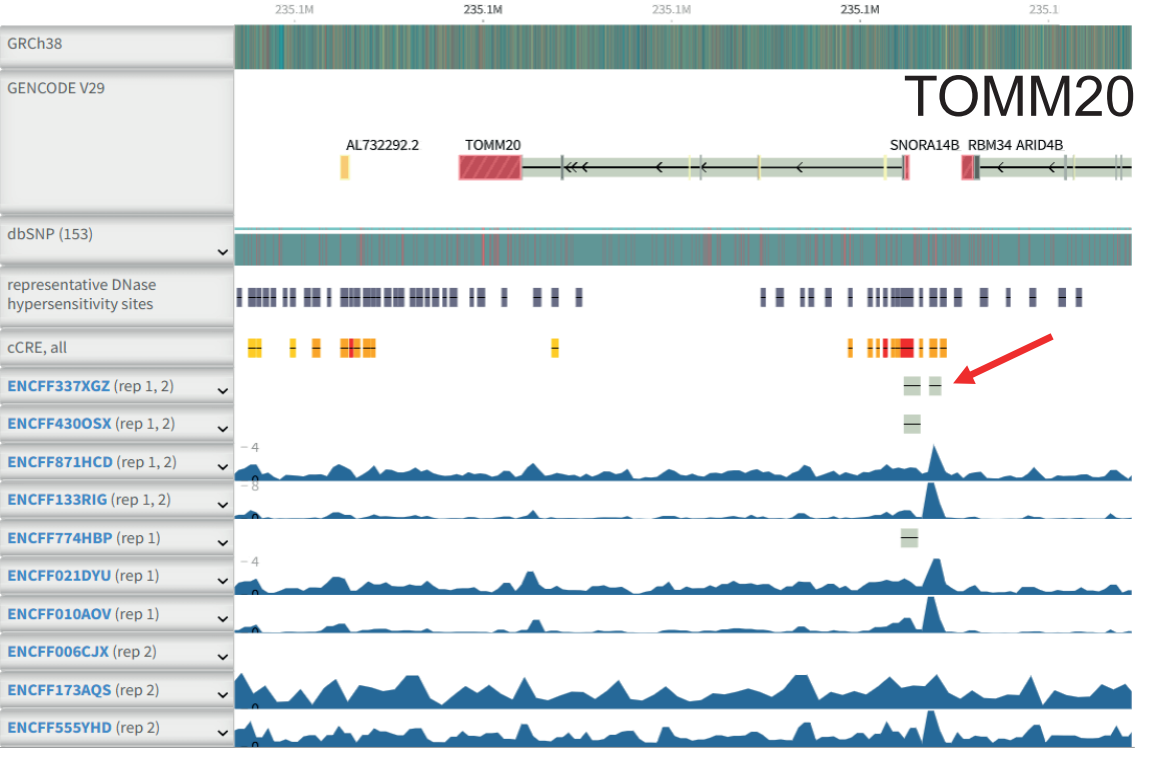

Supplement: s1 [file s1]
